# Supplementary material for: Impact of Tyrosine Kinase Inhibitors on the Immune Response to SARS-CoV-2 Vaccination in Patients with Thoracic Malignancies
Source: MDPI journal article supplement (doi:10.3390/vaccines11101612), 2023-10-19
Supplement: s1 [file s1]

**Supplementary material.**

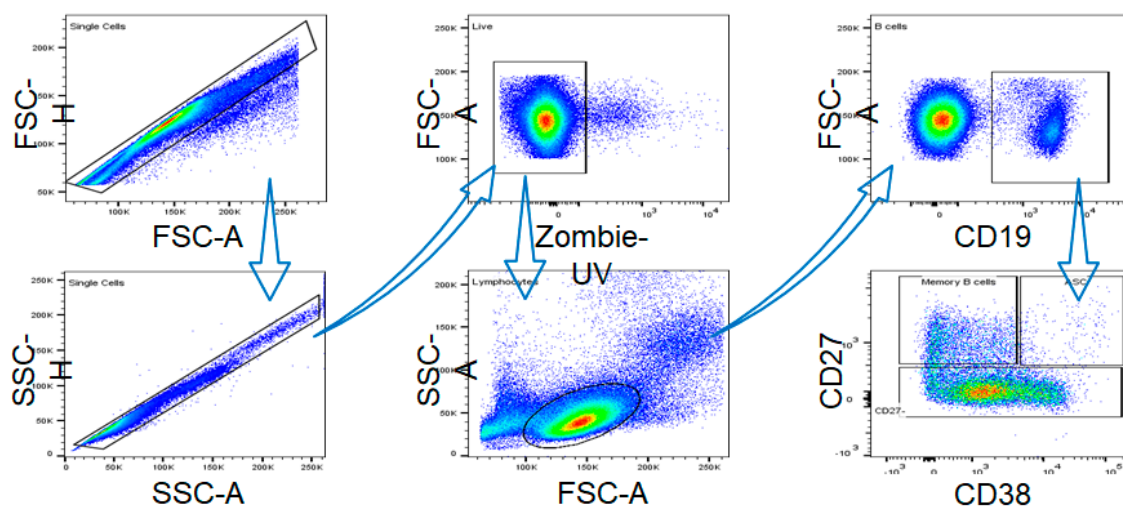

| Antibody/reagent     | Emission peak | Marker Type                                           |
|----------------------|---------------|-------------------------------------------------------|
| APC anti-human CD19  | 660 nm        | Pan B cell                                            |
| PE anti-human CD27   | 574 nm        | Memory B, Plasmablast, Plasma cell                    |
| FITC anti-human CD38 | 525 nm        | Immature B, Germinal Center, Plasmablast, Plasma cell |
| Zombie-UV            | 465 nm        | Fixable Viability Dye                                 |

**Figure S1.** Flow Cytometry-Based Population Analysis and Corresponding Population Marker Emission Peaks.

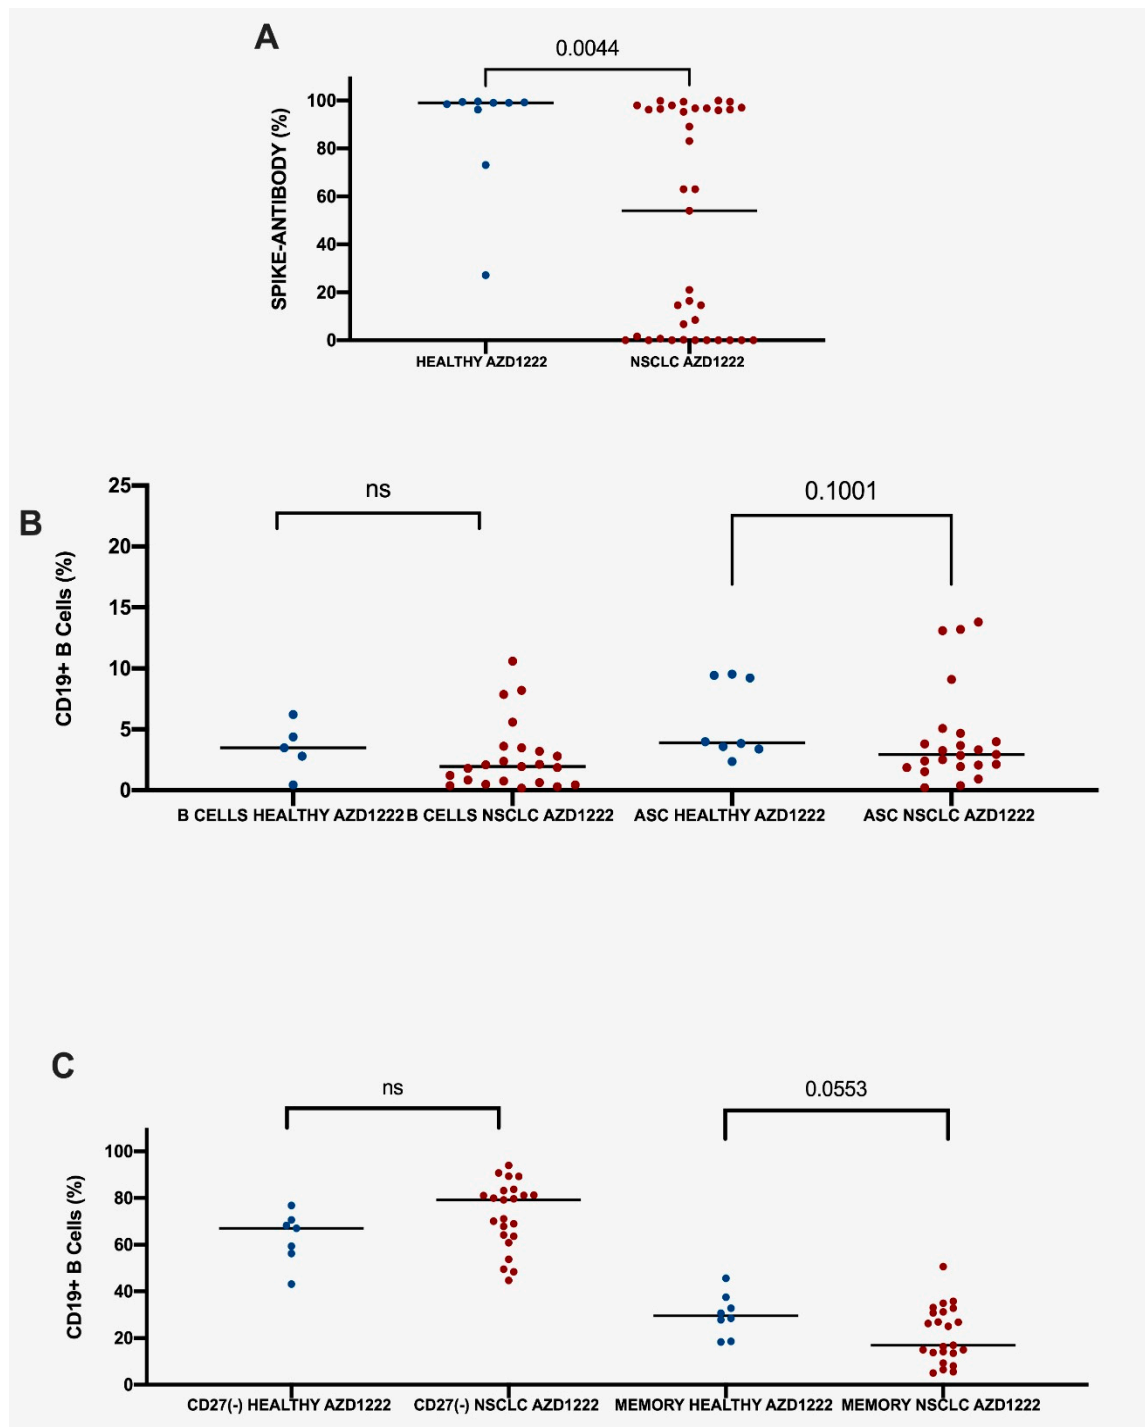

**Figure S2.** Percentage of spike-antibodies between healthy and NSCLC groups that received AZD1222 vaccine. **(A)** Percentage of spike-antibodies between all healthy and NSCLC patients. **(B)** Percentage of CD19+ B cells and ASC between healthy and NSCLC groups. **(C)** CD27(-) and memory CD19+ B cells between healthy and NSCLC groups.

Statistical significance:  $p$  value  $\leq 0.05$ . NSCLC, Non-Small Cell Lung Cancer. ASC, Antibody-Secreting Cells. Ns, non-significant. AZD1222, Oxford-Astra Zeneca vaccine.

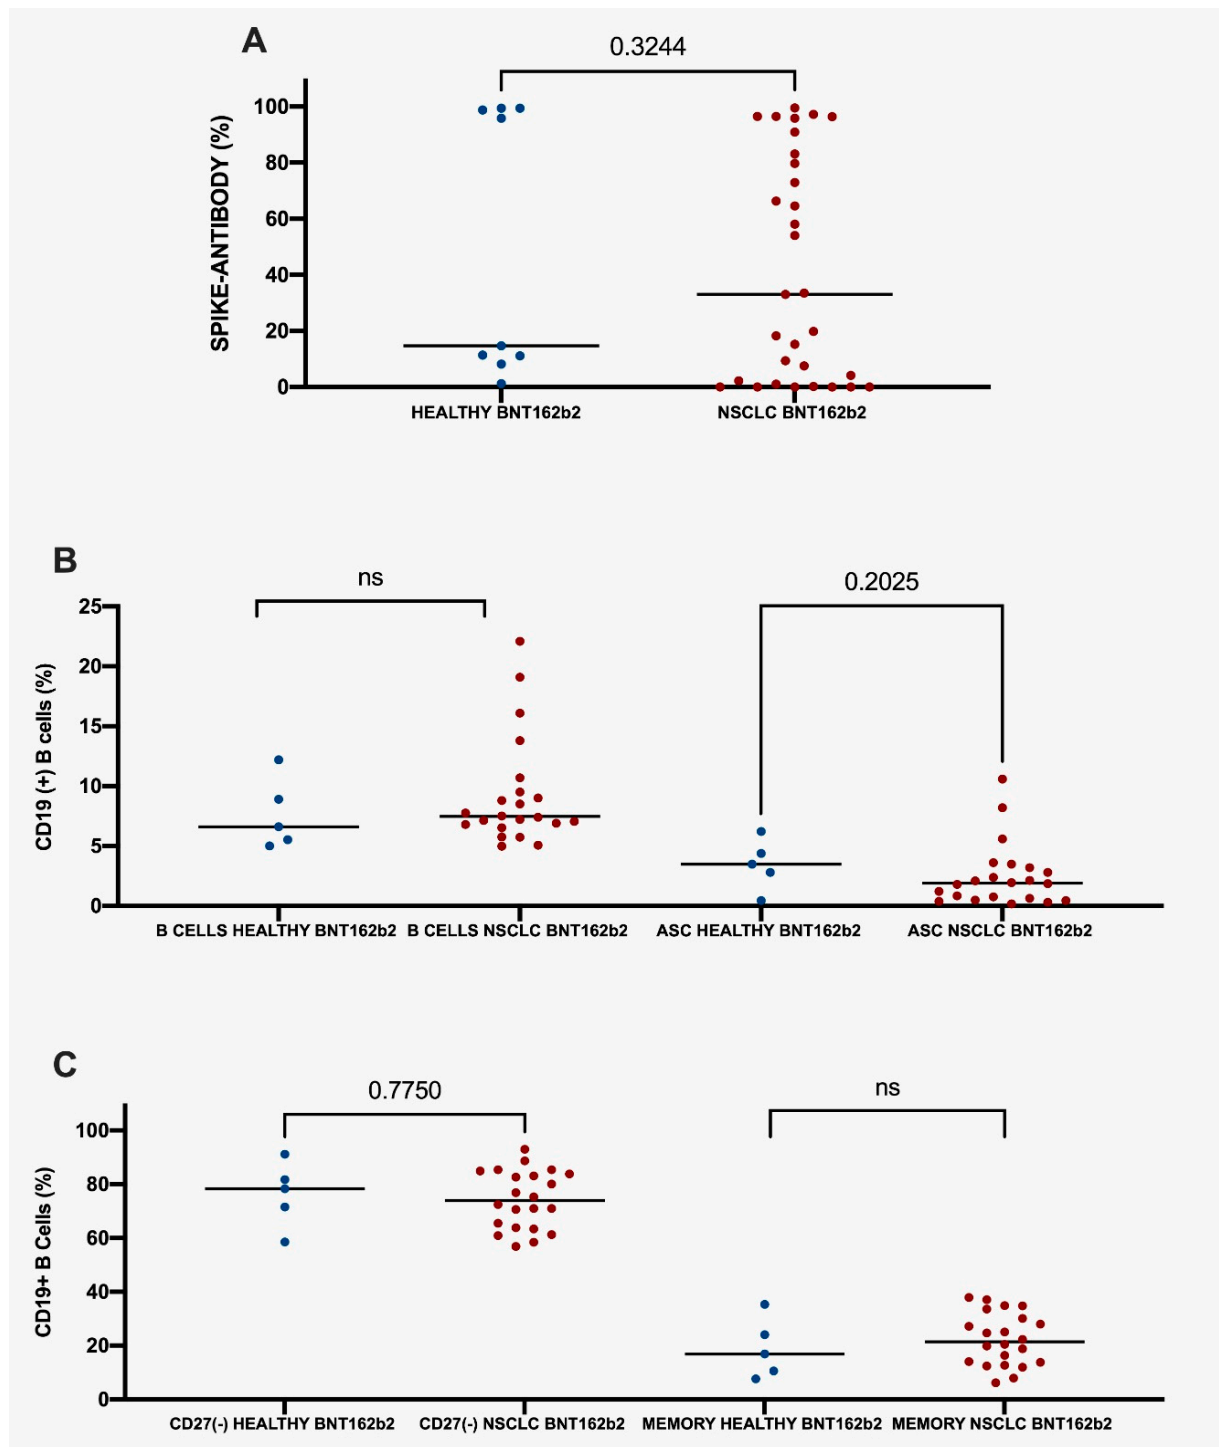

**Figure S3.** Percentage of spike-antibodies between healthy and NSCLC groups that received BNT162b2 vaccine. **(A)** Percentage of spike-antibodies between all healthy and NSCLC patients. **(B)** Percentage of CD19+ B cells and ASC between healthy and NSCLC groups. **(C)** CD27(-) and memory CD19+ B cells between healthy and NSCLC groups. Statistical significance:  $p$  value  $\leq 0.05$ . NSCLC, Non-Small Cell Lung Cancer. ASC, Antibody-Secreting Cells. BNT162b2, BioNTech-Pfizer vaccine.
